# Supplementary material for: l-Lysine mediated synthesis of platinum nanocuboids and their electrocatalytic activity towards ammonia oxidation
Source: Royal Society of Chemistry journal article supplement (doi:10.1039/c4ta03601h), 2014-01-01
Supplement: c4ta03601h1.pdf [file c4ta03601h1.pdf]

## Supporting Information

### **L-Lysine Mediated Synthesis of Pt Nanocuboids and Their Electrocatalytic Activity towards Ammonia Oxidation**

**Geng-tao Fu,<sup>a</sup> Chang Liu,<sup>a</sup> Rui Wu,<sup>a</sup> Yu Chen,<sup>a,b</sup> Xiao-shu Zhu,<sup>\*a</sup> Dong-mei Sun,<sup>a</sup> Ya-wen Tang,<sup>\*a</sup> and Tian-hong Lu<sup>a</sup>**

<sup>a</sup> Jiangsu Key Laboratory of New Power Batteries, Jiangsu Collaborative Innovation Centre of Biomedical Functional Materials, Analysis and Testing Center, School of Chemistry and Materials Science, Nanjing Normal University, Nanjing 210023, China

<sup>b</sup> School of Materials Science and Engineering, Shaanxi Normal University, Xi'an 710062, China

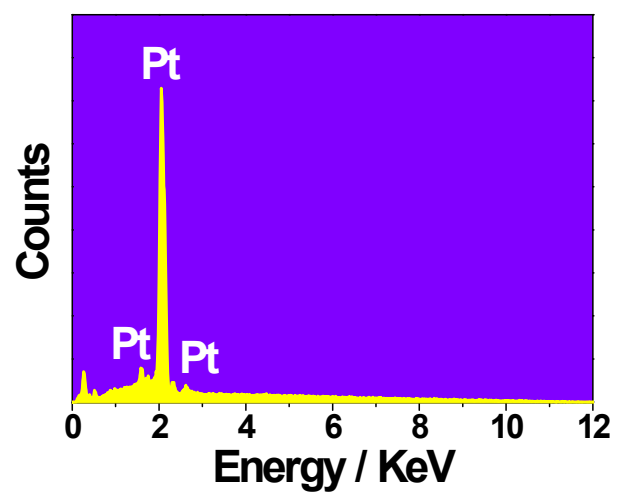

**Fig. S1** EDX spectrum of the as-prepared Pt nanocuboids.

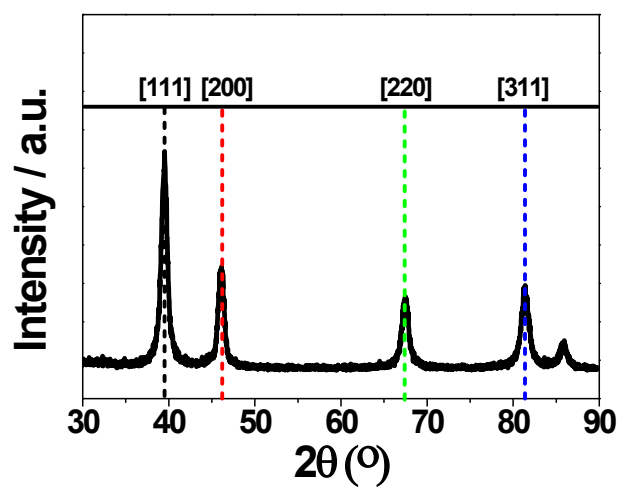

**Fig. S2** XRD pattern of the commercial Pt black.

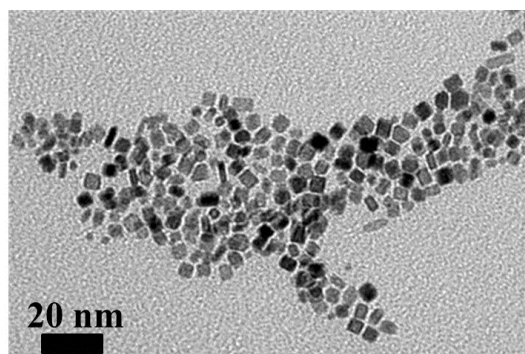

**Fig. S3** TEM images of the product synthesized using the standard procedure but replacing HCHO with acetaldehyde.

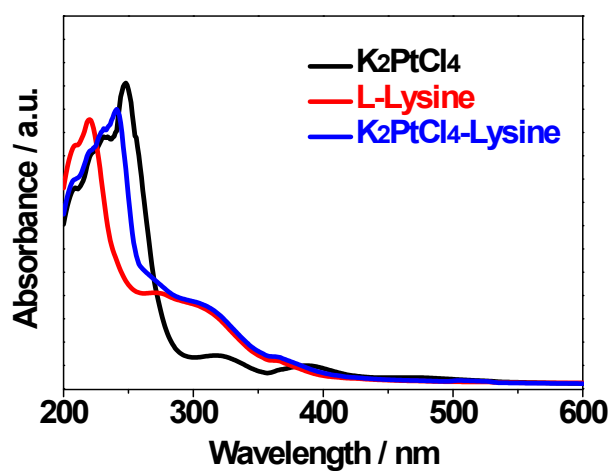

**Fig. S4** UV-vis absorption spectra of  $\text{K}_2\text{PtCl}_4$  solution, L-Lysine solution and the mixture solution of  $\text{K}_2\text{PtCl}_4$  and L-Lysine.

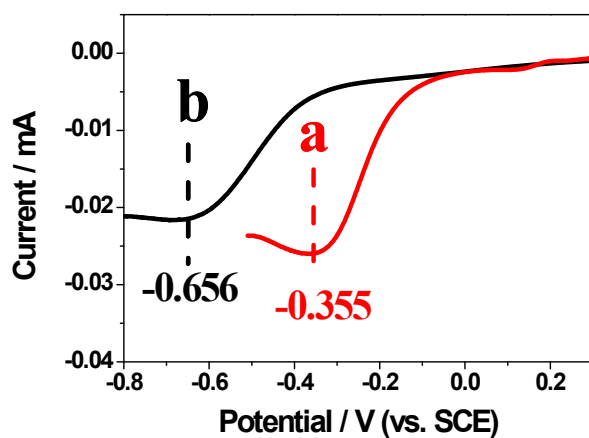

**Fig. S5** Linear sweeping voltammograms of  $N_2$ -saturated (a) 0.005 M  $K_2PtCl_4$  + 0.5 M KCl solution and (b) 0.005 M  $K_2PtCl_4$  + 0.025 M L-Lysine + 0.5 M KCl solution at the glassy carbon electrode at a scan rate of  $100 \text{ mV s}^{-1}$  at pH 9.0, respectively.

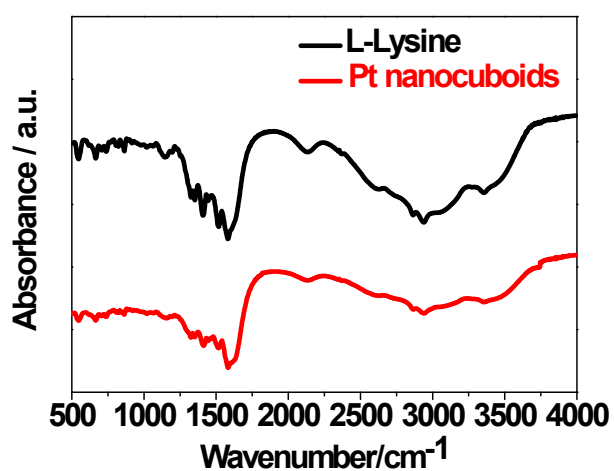

**Fig. S6** FT-IR spectra of as-prepared Pt nanocuboids and L-Lysine.

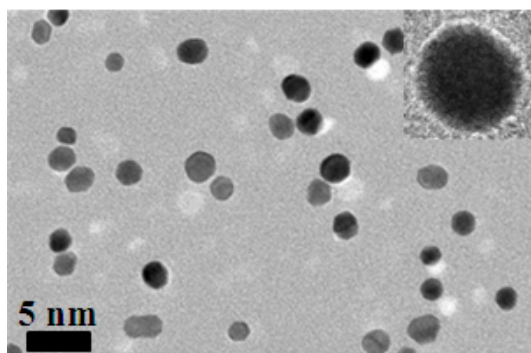

**Fig. S7** TEM image of Pt nanocrystals prepared by displacing the air with O<sub>2</sub>.

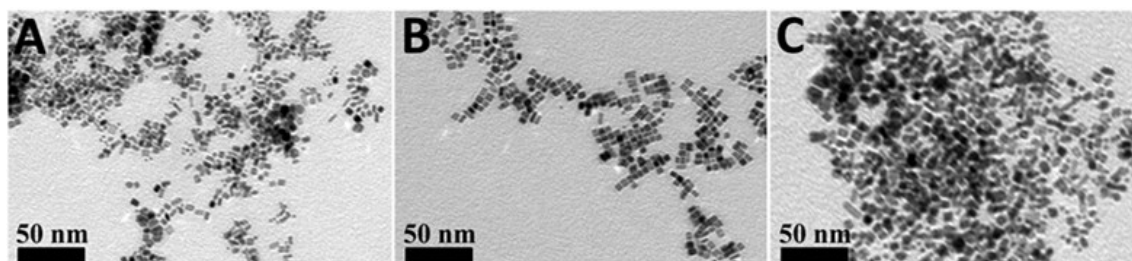

**Fig. S8** TEM images of Pt nanocrystals prepared at different Pt<sup>II</sup> precursor volumes: (A) 0.5 ml, (B) 1.0 ml and (C) 4.0 ml.

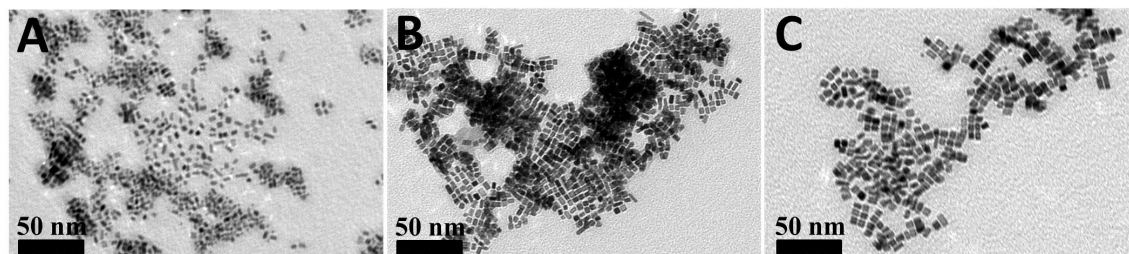

**Fig. S9** TEM images of Pt nanocrystals prepared at different reaction times: (A) 140 °C, (B) 160 °C and (C) 180 °C.

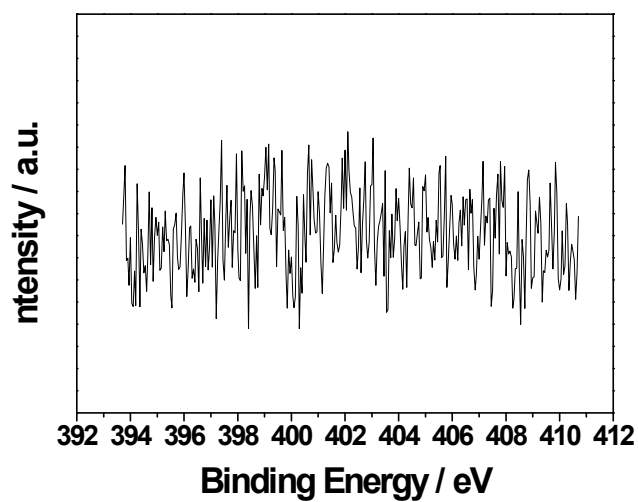

**Fig. S10** XPS spectrum of Pt nanocuboids in the N1s region after UV/Ozone treatment.

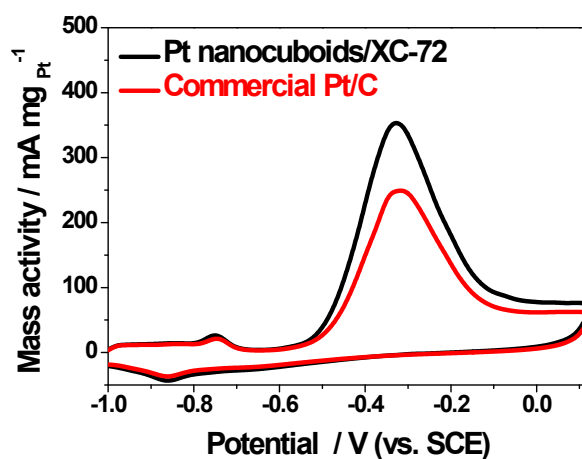

**Fig. S11** Cyclic voltammograms for 20 wt.% Pt nanocuboids/XC-72 and 20 wt.% commercial Pt/C in  $N_2$ -saturated 1 M KOH + 0.1 M  $NH_4OH$  solution at the scan rate of  $10 \text{ mV s}^{-1}$ . For the preparation of 20% wt.% Pt nanocuboids/XC-72 catalyst, 4 mg of Vulcan XC-72 carbon black was added into 10 mL of  $0.1 \text{ mg mL}^{-1}$  Pt nanocuboids suspension with continued stirring for 2 h.

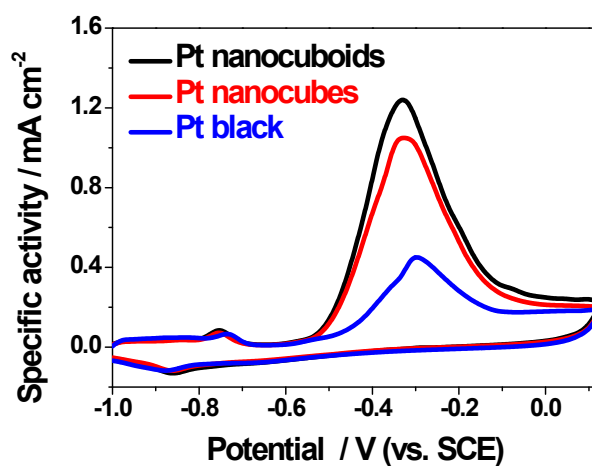

**Fig. S12** Cyclic voltammograms for Pt nanocuboids, Pt nanocubes and Pt black in  $N_2$ -saturated 1 M KOH + 0.1 M  $NH_4OH$  solution at the scan rate of  $10 \text{ mV s}^{-1}$ , 5 nm Pt nanocubes were synthesized under the same conditions as in Fig. 3B.
